# Supplementary material
Source: PubMed Central journal article supplement (PMC208767)

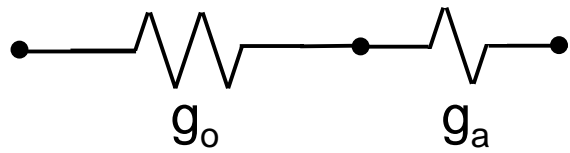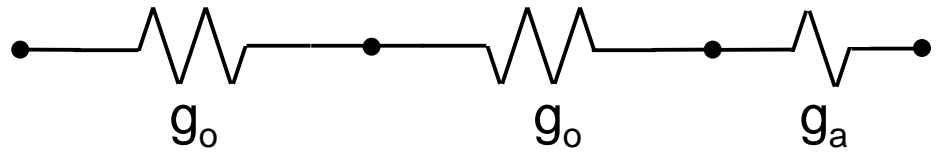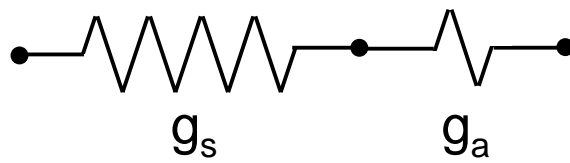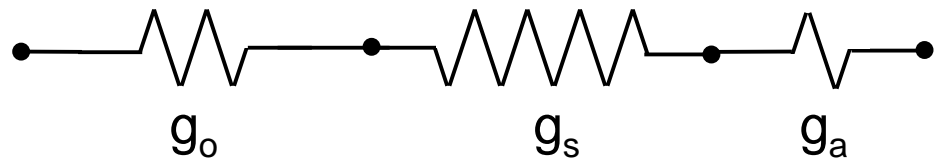

Supplement: pnas_100_20_11388__2.pdf [file pnas_100_20_11388__2.pdf]

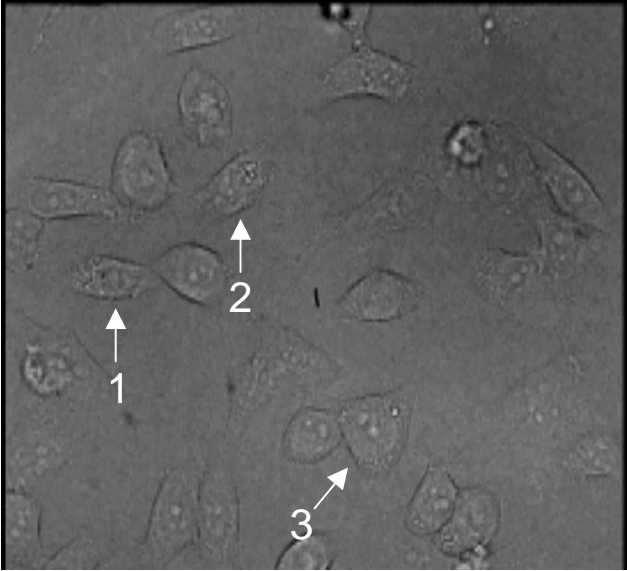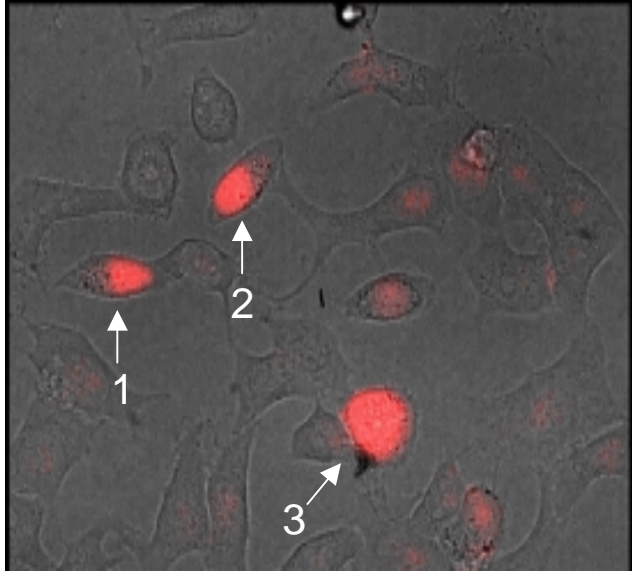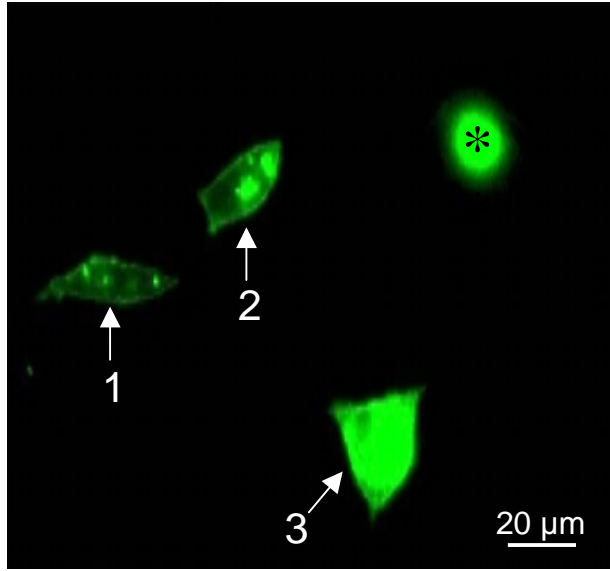

Supplement: pnas_100_20_11388__5.pdf [file pnas_100_20_11388__5.pdf]
